# Supplementary material for: Identification of Mudanjiang Phlebovirus in the Daxing’anling Region of China
Source: MDPI journal article supplement (doi:10.3390/v15122353), 2023-11-30
Supplement: s1 [file s1]

**Figure S1. Amino acid of the RNA-dependent RNA polymerase between MKWV, KURV and MJPV.**

|                                   |                                                                              |                             |                   |                           |            |         |     |       |
|-----------------------------------|------------------------------------------------------------------------------|-----------------------------|-------------------|---------------------------|------------|---------|-----|-------|
|                                   | 1                                                                            | 10                          | 20                | 30                        | 40         | 50      | 60  | 70    |
| MKWV-Japan-Ixodes_persulcatus     | MEPILSRIGNFQGFQKPKQVQHYEADLFNTALPSFQVSNTKAGLSLDVNLEDLDRASTVGSITTKDQVTPMDQILN |                             |                   |                           |            |         |     |       |
| MKWV-China-Heamaphysalis_concinna | MEPILSRIGNFQGFQKPKQVQHYEADLFNTALPSFQVSNTKAGLSLDVNLEDLDRASTVGSITTKDQVTPMDQILN |                             |                   |                           |            |         |     |       |
| MKWV-China-Ixodes_persulcatus     | MEPILSRIGNFQGFQKPKQVQHYEADLFNTALPSFQVSNTKAGLSLDVNLEDLDRASTVGSITTKDQVTPMDQILN |                             |                   |                           |            |         |     |       |
| KURV-Japan-Ixodes_persulcatus     | MEPILSRIGNFQGFQKPKQVQHYEADLFNTALPSFQVSNTKAGLSLDVNLEDLDRASTVGSITTKDQVTPMDQILN |                             |                   |                           |            |         |     |       |
| MJTV-China-Ixodes_persulcatus     | MEPILSRIGNFQGFQKPKQVQHYEADLFNTALPSFQVSNTKAGLSLDVNLEDLDRASTVGSITTKDQVTPMDQILN |                             |                   |                           |            |         |     |       |
| Our_MJTV-Ixodes_persulcatus       | MEPILSRIGNFQGFQKPKQVQHYEADLFNTALPSFQVSNTKAGLSLDVNLEDLDRASTVGSITTKDQVTPMDQILN |                             |                   |                           |            |         |     |       |
|                                   | 80                                                                           | 90                          | 100               | 110                       | 120        | 130     | 140 | 150   |
| MKWV-Japan-Ixodes_persulcatus     | FVHDFTVAHILTKSTDSTRFSEAFPLIGDGFDCGHTP                                        | DDIIITPGQRFVVEYTTNRGNERQARQ | AAATKFAKYELAC     |                           |            |         |     |       |
| MKWV-China-Heamaphysalis_concinna | FVHDFTVAHILTKSTDSTRFSEAFPLIGDGFDCGHTP                                        | DDIIITPGQRFVVEYTTNRGNERQARQ | AAATKFAKYELAC     |                           |            |         |     |       |
| MKWV-China-Ixodes_persulcatus     | FVHDFTVAHILTKSTDSTRFSEAFPLIGDGFDCGHTP                                        | DDIIITPGQRFVVEYTTNRGNERQARQ | AAATKFAKYELAC     |                           |            |         |     |       |
| KURV-Japan-Ixodes_persulcatus     | FVHDFTVAHILTKSTDSTRFSEAFPLIGDGFDCGHTP                                        | DDIIITPGQRFVVEYTTNRGNERQARQ | AAATKFAKYELAC     |                           |            |         |     |       |
| MJTV-China-Ixodes_persulcatus     | FVHDFTVAHILTKSTDSTRFSEAFPLIGDGFDCGHTP                                        | DDIIITPGQRFVVEYTTNRGNERQARQ | AAATKFAKYELAC     |                           |            |         |     |       |
| Our_MJTV-Ixodes_persulcatus       | FVHDFTVAHILTKSTDSTRFSEAFPLIGDGFDCGHTP                                        | DDIIITPGQRFVVEYTTNRGNERQARQ | AAATKFAKYELAC     |                           |            |         |     |       |
|                                   | 160                                                                          | 170                         | 180               | 190                       | 200        | 210     | 220 |       |
| MKWV-Japan-Ixodes_persulcatus     | QNRSSIMPTIMLCVTSVHRDGVNSNIPITQAEVDELVFRFLAVATFGETIREMSPDAIKDDPELSKTEREVLGIIS |                             |                   |                           |            |         |     |       |
| MKWV-China-Heamaphysalis_concinna | QNRSSIMPTIMLCVTSVHRDGVNSNIPITQAEVDELVFRFLAVATFGETIREMSPDAIKDDPELSKTEREVLGIIS |                             |                   |                           |            |         |     |       |
| MKWV-China-Ixodes_persulcatus     | QNRSSIMPTIMLCVTSVHRDGVNSNIPITQAEVDELVFRFLAVATFGETIREMSPDAIKDDPELSKTEREVLGIIS |                             |                   |                           |            |         |     |       |
| KURV-Japan-Ixodes_persulcatus     | QNRSSIMPTIMLCVTSVHRDGVNSNIPITQAEVDELVFRFLAVATFGETIREMSPDAIKDDPELSKTEREVLGIIS |                             |                   |                           |            |         |     |       |
| MJTV-China-Ixodes_persulcatus     | QNRSSIMPTIMLCVTSVHRDGVNSNIPITQAEVDELVFRFLAVATFGETIREMSPDAIKDDPELSKTEREVLGIIS |                             |                   |                           |            |         |     |       |
| Our_MJTV-Ixodes_persulcatus       | QNRSSIMPTIMLCVTSVHRDGVNSNIPITQAEVDELVFRFLAVATFGETIREMSPDAIKDDPELSKTEREVLGIIS |                             |                   |                           |            |         |     |       |
|                                   | 230                                                                          | 240                         | 250               | 260                       | 270        | 280     | 290 | 300   |
| MKWV-Japan-Ixodes_persulcatus     | QIPLDNEKTSKAPFAFQESTITMGFIKSPEDDEYVNSVIAQC                                   | DKAAQDLIRESHMD              | SEDLGRRLNRRITTEMA |                           |            |         |     |       |
| MKWV-China-Heamaphysalis_concinna | QIPLDNEKTSKAPFAFQESTITMGFIKSPEDDEYVNSVIAQC                                   | DKAAQDLIRESHMD              | SEDLGRRLNRRITTEMA |                           |            |         |     |       |
| MKWV-China-Ixodes_persulcatus     | QIPLDNEKTSKAPFAFQESTITMGFIKSPEDDEYVNSVIAQC                                   | DKAAQDLIRESHMD              | SEDLGRRLNRRITTEMA |                           |            |         |     |       |
| KURV-Japan-Ixodes_persulcatus     | QIPLDNEKTSKAPFAFQESTITMGFIKSPEDDEYVNSVIAQC                                   | DKAAQDLIRESHMD              | SEDLGRRLNRRITTEMA |                           |            |         |     |       |
| MJTV-China-Ixodes_persulcatus     | QIPLDNEKTSKAPFAFQESTITMGFIKSPEDDEYVNSVIAQC                                   | DKAAQDLIRESHMD              | SEDLGRRLNRRITTEMA |                           |            |         |     |       |
| Our_MJTV-Ixodes_persulcatus       | QIPLDNEKTSKAPFAFQESTITMGFIKSPEDDEYVNSVIAQC                                   | DKAAQDLIRESHMD              | SEDLGRRLNRRITTEMA |                           |            |         |     |       |
|                                   | 310                                                                          | 320                         | 330               | 340                       | 350        | 360     | 370 |       |
| MKWV-Japan-Ixodes_persulcatus     | IDARMVEYTDGRSMRHEKDRKSTVQFPFVMT                                              | EGPEGKDLSP                  | MDVDVR            | ESPMARVWSSVVRNSCTEETQRMDD |            |         |     |       |
| MKWV-China-Heamaphysalis_concinna | IDARMVEYTDGRSMRHEKDRKSTVQFPFVMT                                              | EGPEGKDLSP                  | MDVDVR            | ESPMARVWSSVVRNSCTEETQRMDD |            |         |     |       |
| MKWV-China-Ixodes_persulcatus     | IDARMVEYTDGRSMRHEKDRKSTVQFPFVMT                                              | EGPEGKDLSP                  | MDVDVR            | ESPMARVWSSVVRNSCTEETQRMDD |            |         |     |       |
| KURV-Japan-Ixodes_persulcatus     | IDARMVEYTDGRSMRHEKDRKSTVQFPFVMT                                              | EGPEGKDLSP                  | MDVDVR            | ESPMARVWSSVVRNSCTEETQRMDD |            |         |     |       |
| MJTV-China-Ixodes_persulcatus     | IDARMVEYTDGRSMRHEKDRKSTVQFPFVMT                                              | EGPEGKDLSP                  | MDVDVR            | ESPMARVWSSVVRNSCTEETQRMDD |            |         |     |       |
| Our_MJTV-Ixodes_persulcatus       | IDARMVEYTDGRSMRHEKDRKSTVQFPFVMT                                              | EGPEGKDLSP                  | MDVDVR            | ESPMARVWSSVVRNSCTEETQRMDD |            |         |     |       |
|                                   | 380                                                                          | 390                         | 400               | 410                       | 420        | 430     | 440 | 450   |
| MKWV-Japan-Ixodes_persulcatus     | DPEEELRLALENSMSSSDQRRQYHRTTILEESERVYAATLGVEAKYKDMPLV                         | QDARAS                      | SKLPFS            | ED                        | HTNDIS     |         |     |       |
| MKWV-China-Heamaphysalis_concinna | DPEEELRLALENSMSSSDQRRQYHRTTILEESERVYAATLGVEAKYKDMPLV                         | QDARAS                      | SKLPFS            | ED                        | HTNDIS     |         |     |       |
| MKWV-China-Ixodes_persulcatus     | DPEEELRLALENSMSSSDQRRQYHRTTILEESERVYAATLGVEAKYKDMPLV                         | QDARAS                      | SKLPFS            | ED                        | HTNDIS     |         |     |       |
| KURV-Japan-Ixodes_persulcatus     | DPEEELRLALENSMSSSDQRRQYHRTTILEESERVYAATLGVEAKYKDMPLV                         | QDARAS                      | SKLPFS            | ED                        | HTNDIS     |         |     |       |
| MJTV-China-Ixodes_persulcatus     | DPEEELRLALENSMSSSDQRRQYHRTTILEESERVYAATLGVEAKYKDMPLV                         | QDARAS                      | SKLPFS            | ED                        | HTNDIS     |         |     |       |
| Our_MJTV-Ixodes_persulcatus       | DPEEELRLALENSMSSSDQRRQYHRTTILEESERVYAATLGVEAKYKDMPLV                         | QDARAS                      | SKLPFS            | ED                        | HTNDIS     |         |     |       |
|                                   | 460                                                                          | 470                         | 480               | 490                       | 500        | 510     | 520 |       |
| MKWV-Japan-Ixodes_persulcatus     | RYHPAGQDFRNDYLYSCPMADSELKKAAKIHQPTLLQ                                        | EGGNEW                      | ITNHDN            | FLQSP                     | MGSLWLOVSV | SGSELAA |     |       |
| MKWV-China-Heamaphysalis_concinna | RYHPAGQDFRNDYLYSCPMADSELKKAAKIHQPTLLQ                                        | EGGNEW                      | ITNHDN            | FLQSP                     | MGSLWLOVSV | SGSELAA |     |       |
| MKWV-China-Ixodes_persulcatus     | RYHPAGQDFRNDYLYSCPMADSELKKAAKIHQPTLLQ                                        | EGGNEW                      | ITNHDN            | FLQSP                     | MGSLWLOVSV | SGSELAA |     |       |
| KURV-Japan-Ixodes_persulcatus     | RYHPAGQDFRNDYLYSCPMADSELKKAAKIHQPTLLQ                                        | EGGNEW                      | ITNHDN            | FLQSP                     | MGSLWLOVSV | SGSELAA |     |       |
| MJTV-China-Ixodes_persulcatus     | RYHPAGQDFRNDYLYSCPMADSELKKAAKIHQPTLLQ                                        | EGGNEW                      | ITNHDN            | FLQSP                     | MGSLWLOVSV | SGSELAA |     |       |
| Our_MJTV-Ixodes_persulcatus       | RYHPAGQDFRNDYLYSCPMADSELKKAAKIHQPTLLQ                                        | EGGNEW                      | ITNHDN            | FLQSP                     | MGSLWLOVSV | SGSELAA |     |       |
|                                   | 530                                                                          | 540                         | 550               | 560                       | 570        | 580     | 590 | 600   |
| MKWV-Japan-Ixodes_persulcatus     | SVKQCHCKPGQFIVKRLNLSGVLLIKPTNSDSHFVSMALDRKNYWRD                              | LGADCFK                     | AYEDV             | GLV                       | TFVSFKVS   |         |     |       |
| MKWV-China-Heamaphysalis_concinna | SVKQCHCKPGQFIVKRLNLSGVLLIKPTNSDSHFVSMALDRKNYWRD                              | LGADCFK                     | AYEDV             | GLV                       | TFVSFKVS   |         |     |       |
| MKWV-China-Ixodes_persulcatus     | SVKQCHCKPGQFIVKRLNLSGVLLIKPTNSDSHFVSMALDRKNYWRD                              | LGADCFK                     | AYEDV             | GLV                       | TFVSFKVS   |         |     |       |
| KURV-Japan-Ixodes_persulcatus     | SVKQCHCKPGQFIVKRLNLSGVLLIKPTNSDSHFVSMALDRKNYWRD                              | LGADCFK                     | AYEDV             | GLV                       | TFVSFKVS   |         |     |       |
| MJTV-China-Ixodes_persulcatus     | SVKQCHCKPGQFIVKRLNLSGVLLIKPTNSDSHFVSMALDRKNYWRD                              | LGADCFK                     | AYEDV             | GLV                       | TFVSFKVS   |         |     |       |
| Our_MJTV-Ixodes_persulcatus       | SVKQCHCKPGQFIVKRLNLSGVLLIKPTNSDSHFVSMALDRKNYWRD                              | LGADCFK                     | AYEDV             | GLV                       | TFVSFKVS   |         |     |       |
|                                   | 610                                                                          | 620                         | 630               | 640                       | 650        | 660     | 670 |       |
| MKWV-Japan-Ixodes_persulcatus     | KLTLNLCKSDSVLSAAACFWAEQYGIKFWL                                               | TS                          | ED                | GL                        | SD         | SP      | NR  | EARSM |
| MKWV-China-Heamaphysalis_concinna | KLTLNLCKSDSVLSAAACFWAEQYGIKFWL                                               | TS                          | ED                | GL                        | SD         | SP      | NR  | EARSM |
| MKWV-China-Ixodes_persulcatus     | KLTLNLCKSDSVLSAAACFWAEQYGIKFWL                                               | TS                          | ED                | GL                        | SD         | SP      | NR  | EARSM |
| KURV-Japan-Ixodes_persulcatus     | KLTLNLCKSDSVLSAAACFWAEQYGIKFWL                                               | TS                          | ED                | GL                        | SD         | SP      | NR  | EARSM |
| MJTV-China-Ixodes_persulcatus     | KLTLNLCKSDSVLSAAACFWAEQYGIKFWL                                               | TS                          | ED                | GL                        | SD         | SP      | NR  | EARSM |
| Our_MJTV-Ixodes_persulcatus       | KLTLNLCKSDSVLSAAACFWAEQYGIKFWL                                               | TS                          | ED                | GL                        | SD         | SP      | NR  | EARSM |



|                                   |            |        |                        |      |                     |                      |                        |       |              |             |        |    |   |    |   |    |   |   |   |   |   |   |   |   |   |   |   |   |   |   |   |   |   |   |   |   |   |   |   |   |   |   |   |   |   |   |   |   |   |   |   |   |   |   |   |   |   |   |   |   |   |   |   |   |   |   |   |   |
|-----------------------------------|------------|--------|------------------------|------|---------------------|----------------------|------------------------|-------|--------------|-------------|--------|----|---|----|---|----|---|---|---|---|---|---|---|---|---|---|---|---|---|---|---|---|---|---|---|---|---|---|---|---|---|---|---|---|---|---|---|---|---|---|---|---|---|---|---|---|---|---|---|---|---|---|---|---|---|---|---|---|
|                                   | 1360       | 1370   | 1380                   | 1390 | 1400                | 1410                 | 1420                   |       |              |             |        |    |   |    |   |    |   |   |   |   |   |   |   |   |   |   |   |   |   |   |   |   |   |   |   |   |   |   |   |   |   |   |   |   |   |   |   |   |   |   |   |   |   |   |   |   |   |   |   |   |   |   |   |   |   |   |   |   |
| MKWV-Japan-Ixodes_persulcatus     | VIRWGNRK   | KYERLL | QSMDLPT                | WEDD | INKNPF              | ILYRAPQSGEEALIRICEKH | HSFGIASSLSKGNVIRVMASVV |       |              |             |        |    |   |    |   |    |   |   |   |   |   |   |   |   |   |   |   |   |   |   |   |   |   |   |   |   |   |   |   |   |   |   |   |   |   |   |   |   |   |   |   |   |   |   |   |   |   |   |   |   |   |   |   |   |   |   |   |   |
| MKWV-China-Haemaphysalis_concinna | VIRWGNRK   | KYERLL | QSMDLPT                | WEDD | INKNPF              | ILYRAPQSGEEALIRICEKH | HSFGIASSLSKGNVIRVMASVV |       |              |             |        |    |   |    |   |    |   |   |   |   |   |   |   |   |   |   |   |   |   |   |   |   |   |   |   |   |   |   |   |   |   |   |   |   |   |   |   |   |   |   |   |   |   |   |   |   |   |   |   |   |   |   |   |   |   |   |   |   |
| MKWV-China-Ixodes_persulcatus     | MIRWGNRK   | KYERLL | QSMDLPT                | WEDD | INKNPF              | ILYRAPQSGEEALIRICEKH | HSFGIASSLSKGNVIRVMASVV |       |              |             |        |    |   |    |   |    |   |   |   |   |   |   |   |   |   |   |   |   |   |   |   |   |   |   |   |   |   |   |   |   |   |   |   |   |   |   |   |   |   |   |   |   |   |   |   |   |   |   |   |   |   |   |   |   |   |   |   |   |
| KURV-Japan-Ixodes_persulcatus     | VIRWGNRK   | KYERLL | QSMDLPT                | WEDD | INKNPF              | ILYRAPQSGEEALIRICEKH | HSFGIASSLSKGNVIRVMASVV |       |              |             |        |    |   |    |   |    |   |   |   |   |   |   |   |   |   |   |   |   |   |   |   |   |   |   |   |   |   |   |   |   |   |   |   |   |   |   |   |   |   |   |   |   |   |   |   |   |   |   |   |   |   |   |   |   |   |   |   |   |
| MJPV-China-Ixodes_persulcatus     | VVRWGNRK   | KYERLL | QSMDLPT                | WEDD | INKNPF              | ILYRAPQSGEEALIRICEKH | HSFGIASSLSKGNVIRVMASVV |       |              |             |        |    |   |    |   |    |   |   |   |   |   |   |   |   |   |   |   |   |   |   |   |   |   |   |   |   |   |   |   |   |   |   |   |   |   |   |   |   |   |   |   |   |   |   |   |   |   |   |   |   |   |   |   |   |   |   |   |   |
| Our_MJPV-Ixodes_persulcatus       | VVRWGNRK   | KYERLL | QSMDLPT                | WEDD | INKNPF              | ILYRAPQSGEEALIRICEKH | HSFGIASSLSKGNVIRVMASVV |       |              |             |        |    |   |    |   |    |   |   |   |   |   |   |   |   |   |   |   |   |   |   |   |   |   |   |   |   |   |   |   |   |   |   |   |   |   |   |   |   |   |   |   |   |   |   |   |   |   |   |   |   |   |   |   |   |   |   |   |   |
|                                   | 1430       | 1440   | 1450                   | 1460 | 1470                | 1480                 | 1490                   | 1500  |              |             |        |    |   |    |   |    |   |   |   |   |   |   |   |   |   |   |   |   |   |   |   |   |   |   |   |   |   |   |   |   |   |   |   |   |   |   |   |   |   |   |   |   |   |   |   |   |   |   |   |   |   |   |   |   |   |   |   |   |
| MKWV-Japan-Ixodes_persulcatus     | YALSAAIYQD | IRRM   | PF                     | SPLG | GGKYSLLSRVIAFETSGII | RL                   | EP                     | DI    | I            | FLFPNIEELEK | DEIAFD | RG | A | IQ | I | RP |   |   |   |   |   |   |   |   |   |   |   |   |   |   |   |   |   |   |   |   |   |   |   |   |   |   |   |   |   |   |   |   |   |   |   |   |   |   |   |   |   |   |   |   |   |   |   |   |   |   |   |   |
| MKWV-China-Haemaphysalis_concinna | YALSAAIYQD | IRRM   | PF                     | SPLG | GGKYSLLSRVIAFETSGII | RL                   | EP                     | DI    | I            | FLFPNIEELEK | DEIAFD | RG | A | IQ | I | RP |   |   |   |   |   |   |   |   |   |   |   |   |   |   |   |   |   |   |   |   |   |   |   |   |   |   |   |   |   |   |   |   |   |   |   |   |   |   |   |   |   |   |   |   |   |   |   |   |   |   |   |   |
| MKWV-China-Ixodes_persulcatus     | YALSAAIYQD | IRRM   | PF                     | SPLG | GGKYSLLSRVIAFETSGII | RL                   | EP                     | DI    | I            | FLFPNIEELEK | DEIAFD | RG | A | IQ | I | RP |   |   |   |   |   |   |   |   |   |   |   |   |   |   |   |   |   |   |   |   |   |   |   |   |   |   |   |   |   |   |   |   |   |   |   |   |   |   |   |   |   |   |   |   |   |   |   |   |   |   |   |   |
| KURV-Japan-Ixodes_persulcatus     | YALSAAIYQD | IRRM   | PF                     | SPLG | GGKYSLLSRVIAFETSGII | RL                   | EP                     | DI    | I            | FLFPNIEELEK | DEIAFD | RG | A | IQ | I | RP |   |   |   |   |   |   |   |   |   |   |   |   |   |   |   |   |   |   |   |   |   |   |   |   |   |   |   |   |   |   |   |   |   |   |   |   |   |   |   |   |   |   |   |   |   |   |   |   |   |   |   |   |
| MJPV-China-Ixodes_persulcatus     | YALSAAIYQD | IRRM   | PF                     | SPLG | GGKYSLLSRVIAFETSGII | RL                   | EP                     | DI    | I            | FLFPNIEELEK | DEIAFD | RG | A | IQ | I | RP |   |   |   |   |   |   |   |   |   |   |   |   |   |   |   |   |   |   |   |   |   |   |   |   |   |   |   |   |   |   |   |   |   |   |   |   |   |   |   |   |   |   |   |   |   |   |   |   |   |   |   |   |
| Our_MJPV-Ixodes_persulcatus       | YALSAAIYQD | IRRM   | PF                     | SPLG | GGKYSLLSRVIAFETSGII | RL                   | EP                     | DI    | I            | FLFPNIEELEK | DEIAFD | RG | A | IQ | I | RP |   |   |   |   |   |   |   |   |   |   |   |   |   |   |   |   |   |   |   |   |   |   |   |   |   |   |   |   |   |   |   |   |   |   |   |   |   |   |   |   |   |   |   |   |   |   |   |   |   |   |   |   |
|                                   | 1510       | 1520   | 1530                   | 1540 | 1550                | 1560                 | 1570                   |       |              |             |        |    |   |    |   |    |   |   |   |   |   |   |   |   |   |   |   |   |   |   |   |   |   |   |   |   |   |   |   |   |   |   |   |   |   |   |   |   |   |   |   |   |   |   |   |   |   |   |   |   |   |   |   |   |   |   |   |   |
| MKWV-Japan-Ixodes_persulcatus     | SSMRESTQ   | IRVQV  | LGDSNOYRVSPDKLVSDKKWFQ | TS   | SKVSR               | TL                   | ED                     | DL    | W            | RL          | A      | RL | S | W  | L | R  | D | T | E | E | T | L | E | A | S | P | L | A | S | H |   |   |   |   |   |   |   |   |   |   |   |   |   |   |   |   |   |   |   |   |   |   |   |   |   |   |   |   |   |   |   |   |   |   |   |   |   |   |
| MKWV-China-Haemaphysalis_concinna | SSMRESTQ   | IRVQV  | LGDSNOYRVSPDKLVSDKKWFQ | TS   | SKVSR               | TL                   | ED                     | DL    | W            | RL          | A      | RL | S | W  | L | R  | D | T | E | E | T | L | E | A | S | P | L | A | S | H |   |   |   |   |   |   |   |   |   |   |   |   |   |   |   |   |   |   |   |   |   |   |   |   |   |   |   |   |   |   |   |   |   |   |   |   |   |   |
| MKWV-China-Ixodes_persulcatus     | SSMRESTQ   | IRVQV  | LGDSNOYRVSPDKLVSDKKWFQ | TS   | SKVSR               | TL                   | ED                     | DL    | W            | RL          | A      | RL | S | W  | L | R  | D | T | E | E | T | L | E | A | S | P | L | A | S | H |   |   |   |   |   |   |   |   |   |   |   |   |   |   |   |   |   |   |   |   |   |   |   |   |   |   |   |   |   |   |   |   |   |   |   |   |   |   |
| KURV-Japan-Ixodes_persulcatus     | SSMRESTQ   | IRVQV  | LGDSNOYRVSPDKLVSDKKWFQ | TS   | SKVSR               | TL                   | ED                     | DL    | W            | RL          | A      | RL | S | W  | L | R  | D | T | E | E | T | L | E | A | S | P | L | A | S | H |   |   |   |   |   |   |   |   |   |   |   |   |   |   |   |   |   |   |   |   |   |   |   |   |   |   |   |   |   |   |   |   |   |   |   |   |   |   |
| MJPV-China-Ixodes_persulcatus     | SSMRESTQ   | IRVQV  | LGDSNOYRVSPDKLVSDKKWFQ | TS   | SKVSR               | TL                   | ED                     | DL    | W            | RL          | A      | RL | S | W  | L | R  | D | T | E | E | T | L | E | A | S | P | L | A | S | H |   |   |   |   |   |   |   |   |   |   |   |   |   |   |   |   |   |   |   |   |   |   |   |   |   |   |   |   |   |   |   |   |   |   |   |   |   |   |
| Our_MJPV-Ixodes_persulcatus       | SSMRESTQ   | IRVQV  | LGDSNOYRVSPDKLVSDKKWFQ | TS   | SKVSR               | TL                   | ED                     | DL    | W            | RL          | A      | RL | S | W  | L | R  | D | T | E | E | T | L | E | A | S | P | L | A | S | H |   |   |   |   |   |   |   |   |   |   |   |   |   |   |   |   |   |   |   |   |   |   |   |   |   |   |   |   |   |   |   |   |   |   |   |   |   |   |
|                                   | 1580       | 1590   | 1600                   | 1610 | 1620                | 1630                 | 1640                   | 1650  |              |             |        |    |   |    |   |    |   |   |   |   |   |   |   |   |   |   |   |   |   |   |   |   |   |   |   |   |   |   |   |   |   |   |   |   |   |   |   |   |   |   |   |   |   |   |   |   |   |   |   |   |   |   |   |   |   |   |   |   |
| MKWV-Japan-Ixodes_persulcatus     | VOI        | RN     | FLARM                  | SKPR | FL                  | SITGAPVKK            | RSGL                   | SKMLS | SVLRDNFARDAI | D           | IED    | H  | V | G  | L | S  | K | H | T | A | T | E | L | V | K | H | S | L | F | C | A | L | O | G |   |   |   |   |   |   |   |   |   |   |   |   |   |   |   |   |   |   |   |   |   |   |   |   |   |   |   |   |   |   |   |   |   |   |
| MKWV-China-Haemaphysalis_concinna | VOI        | RN     | FLARM                  | SKPR | FL                  | SITGAPVKK            | RSGL                   | SKMLS | SVLRDNFARDAI | D           | IED    | H  | V | G  | L | S  | K | H | T | A | T | E | L | V | K | H | S | L | F | C | A | L | O | G |   |   |   |   |   |   |   |   |   |   |   |   |   |   |   |   |   |   |   |   |   |   |   |   |   |   |   |   |   |   |   |   |   |   |
| MKWV-China-Ixodes_persulcatus     | VOI        | RN     | FLARM                  | SKPR | FL                  | SITGAPVKK            | RSGL                   | SKMLS | SVLRDNFARDAI | D           | IED    | H  | V | G  | L | S  | K | H | T | A | T | E | L | V | K | H | S | L | F | C | A | L | O | G |   |   |   |   |   |   |   |   |   |   |   |   |   |   |   |   |   |   |   |   |   |   |   |   |   |   |   |   |   |   |   |   |   |   |
| KURV-Japan-Ixodes_persulcatus     | VOI        | RN     | FLARM                  | SKPR | FL                  | SITGAPVKK            | RSGL                   | SKMLS | SVLRDNFARDAI | D           | IED    | H  | V | G  | L | S  | K | H | T | A | T | E | L | V | K | H | S | L | F | C | A | L | O | G |   |   |   |   |   |   |   |   |   |   |   |   |   |   |   |   |   |   |   |   |   |   |   |   |   |   |   |   |   |   |   |   |   |   |
| MJPV-China-Ixodes_persulcatus     | VOI        | RN     | FLARM                  | SKPR | FL                  | SITGAPVKK            | RSGL                   | SKMLS | SVLRDNFARDAI | D           | IED    | H  | V | G  | L | S  | K | H | T | A | T | E | L | V | K | H | S | L | F | C | A | L | O | G |   |   |   |   |   |   |   |   |   |   |   |   |   |   |   |   |   |   |   |   |   |   |   |   |   |   |   |   |   |   |   |   |   |   |
| Our_MJPV-Ixodes_persulcatus       | VOI        | RN     | FLARM                  | SKPR | FL                  | SITGAPVKK            | RSGL                   | SKMLS | SVLRDNFARDAI | D           | IED    | H  | V | G  | L | S  | K | H | T | A | T | E | L | V | K | H | S | L | F | C | A | L | O | G |   |   |   |   |   |   |   |   |   |   |   |   |   |   |   |   |   |   |   |   |   |   |   |   |   |   |   |   |   |   |   |   |   |   |
|                                   | 1660       | 1670   | 1680                   | 1690 | 1700                | 1710                 | 1720                   |       |              |             |        |    |   |    |   |    |   |   |   |   |   |   |   |   |   |   |   |   |   |   |   |   |   |   |   |   |   |   |   |   |   |   |   |   |   |   |   |   |   |   |   |   |   |   |   |   |   |   |   |   |   |   |   |   |   |   |   |   |
| MKWV-Japan-Ixodes_persulcatus     | PYT        | D      | STKEQL                 | QYFL | GL                  | ALPEIPL              | KD                     | QDGK  | TRSNVLA      | L           | Q      | R  | F | V  | S | S  | E | S | V | I | D | I | R | V | G | A | I | V | G | G | T | R | P | Q | R | A | A | R | R | D | G |   |   |   |   |   |   |   |   |   |   |   |   |   |   |   |   |   |   |   |   |   |   |   |   |   |   |   |
| MKWV-China-Haemaphysalis_concinna | PYT        | D      | STKEQL                 | QYFL | GL                  | ALPEIPL              | KD                     | QDGK  | TRSNVLA      | L           | Q      | R  | F | V  | S | S  | E | S | V | I | D | I | R | V | G | A | I | V | G | G | T | R | P | Q | R | A | A | R | R | D | G |   |   |   |   |   |   |   |   |   |   |   |   |   |   |   |   |   |   |   |   |   |   |   |   |   |   |   |
| MKWV-China-Ixodes_persulcatus     | PYT        | D      | STKEQL                 | QYFL | GL                  | ALPEIPL              | KD                     | QDGK  | TRSNVLA      | L           | Q      | R  | F | V  | S | S  | E | S | V | I | D | I | R | V | G | A | I | V | G | G | T | R | P | Q | R | A | A | R | R | D | G |   |   |   |   |   |   |   |   |   |   |   |   |   |   |   |   |   |   |   |   |   |   |   |   |   |   |   |
| KURV-Japan-Ixodes_persulcatus     | PYT        | D      | STKEQL                 | QYFL | GL                  | ALPEIPL              | KD                     | QDGK  | TRSNVLA      | L           | Q      | R  | F | V  | S | S  | E | S | V | I | D | I | R | V | G | A | I | V | G | G | T | R | P | Q | R | A | A | R | R | D | G |   |   |   |   |   |   |   |   |   |   |   |   |   |   |   |   |   |   |   |   |   |   |   |   |   |   |   |
| MJPV-China-Ixodes_persulcatus     | PYT        | D      | STKEQL                 | QYFL | GL                  | ALPEIPL              | KD                     | QDGK  | TRSNVLA      | L           | Q      | R  | F | V  | S | S  | E | S | V | I | D | I | R | V | G | A | I | V | G | G | T | R | P | Q | R | A | A | R | R | D | G |   |   |   |   |   |   |   |   |   |   |   |   |   |   |   |   |   |   |   |   |   |   |   |   |   |   |   |
| Our_MJPV-Ixodes_persulcatus       | PYT        | D      | STKEQL                 | QYFL | GL                  | ALPEIPL              | KD                     | QDGK  | TRSNVLA      | L           | Q      | R  | F | V  | S | S  | E | S | V | I | D | I | R | V | G | A | I | V | G | G | T | R | P | Q | R | A | A | R | R | D | G |   |   |   |   |   |   |   |   |   |   |   |   |   |   |   |   |   |   |   |   |   |   |   |   |   |   |   |
|                                   | 1730       | 1740   | 1750                   | 1760 | 1770                | 1780                 | 1790                   | 1800  |              |             |        |    |   |    |   |    |   |   |   |   |   |   |   |   |   |   |   |   |   |   |   |   |   |   |   |   |   |   |   |   |   |   |   |   |   |   |   |   |   |   |   |   |   |   |   |   |   |   |   |   |   |   |   |   |   |   |   |   |
| MKWV-Japan-Ixodes_persulcatus     | FHY        | H      | GGPTWRGV               | MDG  | V                   | Q                    | VOID                   | IDNRE | QEP          | PPQ         | VA     | T  | V | S  | G | T  | Q | T | P | W | A | I | P | S | L | Q | S | W | C | D | V | R | S | K | S | R | P | G | A | K | F |   |   |   |   |   |   |   |   |   |   |   |   |   |   |   |   |   |   |   |   |   |   |   |   |   |   |   |
| MKWV-China-Haemaphysalis_concinna | FHY        | H      | GGPTWRGV               | MDG  | V                   | Q                    | VOID                   | IDNRE | QEP          | PPQ         | VA     | T  | V | S  | G | T  | Q | T | P | W | A | I | P | S | L | Q | S | W | C | D | V | R | S | K | S | R | P | G | A | K | F |   |   |   |   |   |   |   |   |   |   |   |   |   |   |   |   |   |   |   |   |   |   |   |   |   |   |   |
| MKWV-China-Ixodes_persulcatus     | FHY        | H      | GGPTWRGV               | MDG  | V                   | Q                    | VOID                   | IDNRE | QEP          | PPQ         | VA     | T  | V | S  | G | T  | Q | T | P | W | A | I | P | S | L | Q | S | W | C | D | V | R | S | K | S | R | P | G | A | K | F |   |   |   |   |   |   |   |   |   |   |   |   |   |   |   |   |   |   |   |   |   |   |   |   |   |   |   |
| KURV-Japan-Ixodes_persulcatus     | FHY        | H      | GGPTWRGV               | MDG  | V                   | Q                    | VOID                   | IDNRE | QEP          | PPQ         | VA     | T  | V | S  | G | T  | Q | T | P | W | A | I | P | S | L | Q | S | W | C | D | V | R | S | K | S | R | P | G | A | K | F |   |   |   |   |   |   |   |   |   |   |   |   |   |   |   |   |   |   |   |   |   |   |   |   |   |   |   |
| MJPV-China-Ixodes_persulcatus     | FHY        | H      | GGPTWRGV               | MDG  | V                   | Q                    | VOID                   | IDNRE | QEP          | PPQ         | VA     | T  | V | S  | G | T  | Q | T | P | W | A | I | P | S | L | Q | S | W | C | D | V | R | S | K | S | R | P | G | A | K | F |   |   |   |   |   |   |   |   |   |   |   |   |   |   |   |   |   |   |   |   |   |   |   |   |   |   |   |
| Our_MJPV-Ixodes_persulcatus       | FHY        | H      | GGPTWRGV               | MDG  | V                   | Q                    | VOID                   | IDNRE | QEP          | PPQ         | VA     | T  | V | S  | G | T  | Q | T | P | W | A | I | P | S | L | Q | S | W | C | D | V | R | S | K | S | R | P | G | A | K | F |   |   |   |   |   |   |   |   |   |   |   |   |   |   |   |   |   |   |   |   |   |   |   |   |   |   |   |
|                                   | 1810       | 1820   | 1830                   | 1840 | 1850                | 1860                 | 1870                   |       |              |             |        |    |   |    |   |    |   |   |   |   |   |   |   |   |   |   |   |   |   |   |   |   |   |   |   |   |   |   |   |   |   |   |   |   |   |   |   |   |   |   |   |   |   |   |   |   |   |   |   |   |   |   |   |   |   |   |   |   |
| MKWV-Japan-Ixodes_persulcatus     | WIY        | G      | F                      | R    | M                   | S                    | G                      | P     | S            | S           | P      | G  | V | P  | V | I  | V | Y | R | I | S | D | E | L | S | K | S | D | I | P | I | S | M | K | V | R | N | S | T | I | N | L | Y | T | R | S | R | F | T | A | D | L | H | L | S | Y | T | A | S | D | O | D | I | S | S | A | S | I |
| MKWV-China-Haemaphysalis_concinna | WIY        | G      | F                      | R    | M                   | S                    | G                      | P     | S            | S           | P      | G  | V | P  | V | I  | V | Y | R | I | S | D | E | L | S | K | S | D | I | P | I | S | M | K | V | R | N | S | T | I | N | L | Y | T | R | S | R | F | T | A | D | L | H | L | S | Y | T | A | S | D | O | D | I | S | S | A | S | I |
| MKWV-China-Ixodes_persulcatus     | WIY        | G      | F                      | R    | M                   | S                    | G                      | P     | S            | S           | P      | G  | V | P  | V | I  | V | Y | R | I | S | D | E | L | S | K | S | D | I | P | I | S | M | K | V | R | N | S | T | I | N | L | Y | T | R | S | R | F | T | A | D | L | H | L | S | Y | T | A | S | D | O | D | I | S | S | A | S | I |
| KURV-Japan-Ixodes_persulcatus     | WIY        | G      | F                      | R    | M                   | S                    | G                      | P     | S            | S           | P      | G  | V | P  | V | I  | V | Y | R | I | S | D | E | L | S | K | S | D | I | P | I | S | M | K | V | R | N | S | T | I | N | L | Y | T | R | S | R | F | T | A | D | L | H | L | S | Y | T | A | S | D | O | D | I | S | S | A | S | I |
| MJPV-China-Ixodes_persulcatus     | WIY        | G      | F                      | R    | M                   | S                    | G                      | P     | S            | S           | P      | G  | V | P  | V | I  | V | Y | R | I | S | D | E | L | S | K | S | D | I | P | I | S | M | K | V | R | N | S | T | I | N | L | Y | T | R | S | R | F | T | A | D | L | H | L | S | Y | T | A | S | D | O | D | I | S | S | A | S | I |
| Our_MJPV-Ixodes_persulcatus       | WIY        | G      | F                      | R    | M                   | S                    | G                      | P     | S            | S           | P      | G  | V | P  | V | I  | V | Y | R | I | S | D | E | L | S | K | S | D | I | P | I | S | M | K | V | R | N | S | T | I | N | L | Y | T | R | S | R | F | T | A | D | L | H | L | S | Y | T | A | S | D | O | D | I | S | S | A | S | I |
|                                   | 1880       | 1890   | 1900                   | 1910 | 1920                | 1930                 | 1940                   | 1950  |              |             |        |    |   |    |   |    |   |   |   |   |   |   |   |   |   |   |   |   |   |   |   |   |   |   |   |   |   |   |   |   |   |   |   |   |   |   |   |   |   |   |   |   |   |   |   |   |   |   |   |   |   |   |   |   |   |   |   |   |
| MKWV-Japan-Ixodes_persulcatus     | AAL        | R      | K                      | C    | E                   | D                    | Q                      | L     | E            | D           | L      | K  | R | E  | P | T  | C | S | W | F | N | C | P | L | D | I | C | M | V | E | A | L | A | Q | V | L | D | G | R | S | L | P | R | H | L | D | K | E | R | L | S | S | I | F | K | M | S | C | E | S | S | R | A | R | I | G | G | L |
| MKWV-China-Haemaphysalis_concinna | AAL        | R      | K                      | C    | E                   | D                    | Q                      | L     | E            | D           | L      | K  | R | E  | P | T  | C | S | W | F | N | C | P | L | D | I | C | M | V | E | A | L | A | Q | V | L | D | G | R | S | L | P | R | H | L | D | K | E | R | L | S | S | I | F | K | M | S | C | E | S | S | R | A | R | I | G | G | L |
| MKWV-China-Ixodes_persulcatus     | AAL        | R      | K                      | C    | E                   | D                    | Q                      | L     | E            | D           | L      | K  | R | E  | P | T  | C | S | W | F | N | C | P | L | D | I | C | M | V | E | A | L | A | Q | V | L | D | G | R | S | L | P | R | H | L | D | K | E | R | L | S | S | I | F | K | M | S | C | E | S | S | R | A | R | I | G | G | L |
| KURV-Japan-Ixodes_persulcatus     | AAL        | R      | K                      | C    | E                   | D                    | Q                      | L     | E            | D           | L      | K  | R | E  | P | T  | C | S | W | F | N | C | P | L | D | I | C | M | V | E | A | L | A | Q | V | L | D | G | R | S | L | P | R | H | L | D | K | E | R | L | S | S | I | F | K | M | S | C | E | S | S | R | A | R | I | G | G | L |
| MJPV-China-Ixodes_persulcatus     | AAL        | R      | K                      | C    | E                   | D                    | Q                      | L     | E            | D           | L      | K  | R | E  | P | T  | C | S | W | F | N | C | P | L | D | I | C | M | V | E | A | L | A | Q | V | L | D | G | R | S | L | P | R | H | L | D | K | E | R | L | S | S | I | F | K | M | S | C | E | S | S | R | A | R | I | G | G | L |
| Our_MJPV-Ixodes_persulcatus       | AAL        | R      | K                      | C    | E                   | D                    | Q                      | L     | E            | D           | L      | K  | R | E  | P | T  | C | S | W | F | N | C | P | L | D | I | C | M | V | E | A | L | A | Q | V | L | D | G | R | S | L | P | R | H | L | D | K | E | R | L | S | S | I | F | K | M | S | C | E | S | S | R | A | R | I | G | G | L |
|                                   | 1960       | 1970   | 1980                   | 1990 | 2000                | 2010                 | 2020                   |       |              |             |        |    |   |    |   |    |   |   |   |   |   |   |   |   |   |   |   |   |   |   |   |   |   |   |   |   |   |   |   |   |   |   |   |   |   |   |   |   |   |   |   |   |   |   |   |   |   |   |   |   |   |   |   |   |   |   |   |   |
| MKWV-Japan-Ixodes_persulcatus     | P          | L      | A                      | E    | V                   | K                    | I                      | E     | D            | N           | S      | N  | F | L  | Q | D  | M | I | G | E | V | M | L | S | L | K | S | D | E | L | F | E | Q | A | V | E | G | M | E | L | P | N | I | S | D | L | D | F | E | G | E | D | S | G | I | E | A | F | G |   |   |   |   |   |   |   |   |   |

**Figure S2. Amino acid of the glycoprotein precursor between MKWV, KURV and MJPV.**

|                                    |         |          |        |             |       |            |            |               |
|------------------------------------|---------|----------|--------|-------------|-------|------------|------------|---------------|
|                                    | 1       | 10       | 20     | 30          | 40    | 50         | 60         | 70            |
| MKWV-Japan-Ixodes_persulcatus      | MMKILMQ | LLTSGALT | LCPPHL | KNRRIMGHNSI | STLHL | ESCTATDYDK | CAEFETWSDP | PTRYPLFYSKHHM |
| MKWV-China-Beaemophysalis_concinna | MMKILIQ | LLTSGALT | LCPPHL | KNRRIMGHNSI | STLHL | ESCTATDYDK | CAEFETWSDP | PTRYPLFYSKHHM |
| MKWV-China-Ixodes_persulcatus      | MMKILQ  | LLTSGALT | LCPPHL | KNRRIMGHNSI | STLHL | ESCTATDYDK | CAEFETWSDP | PTRYPLFYSKHHM |
| KURV-Japan-Ixodes_persulcatus      | MMKILMQ | LLTSGALT | LCPPHL | KNRRIMGHNSI | STLHL | ESCTATDYDK | CAEFETWSDP | PTRYPLFYSKHHM |
| MJPV-China-Ixodes_persulcatus      | MMKILQ  | LLTSGALT | LCPPHL | KNRRIMGHNSI | STLHL | ESCTATDYDK | CAEFETWSDP | PTRYPLFYSKHHM |
| Our_MJPV-Ixodes_persulcatus        | MMKILQ  | LLTSGALT | LCPPHL | KNRRIMGHNSI | STLHL | ESCTATDYDK | CAEFETWSDP | PTRYPLFYSKHHM |

  

|                                    |         |         |          |          |        |              |             |               |
|------------------------------------|---------|---------|----------|----------|--------|--------------|-------------|---------------|
|                                    | 80      | 90      | 100      | 110      | 120    | 130          | 140         |               |
| MKWV-Japan-Ixodes_persulcatus      | LNAEAMN | KLRLKSN | CGSNTGCK | VSKKEMFL | REHVNC | ASNPTSLILGMG | KDGGFHLWECE | PKTVFSQDLMQGE |
| MKWV-China-Beaemophysalis_concinna | LNAEAMN | KLRLKSN | CGSNTGCK | VSKKEMFL | REHVNC | ASNPTSLILGMG | KDGGFHLWECE | PKTVFSQDLMQGE |
| MKWV-China-Ixodes_persulcatus      | LNAEAMN | KLRLKSN | CGSNTGCK | VSKKEMFL | REHVNC | ASNPTSLILGMG | KDGGFHLWECE | PKTVFSQDLMQGE |
| KURV-Japan-Ixodes_persulcatus      | LNAEAMN | KLRLKSN | CGSNTGCK | VSKKEMFL | REHVNC | ASNPTSLILGMG | KDGGFHLWECE | PKTVFSQDLMQGE |
| MJPV-China-Ixodes_persulcatus      | LNAEAMN | KLRLKSN | CGSNTGCK | VSKKEMFL | REHVNC | ASNPTSLILGMG | KDGGFHLWECE | PKTVFSQDLMQGE |
| Our_MJPV-Ixodes_persulcatus        | LNAEAMN | KLRLKSN | CGSNTGCK | VSKKEMFL | REHVNC | ASNPTSLILGMG | KDGGFHLWECE | PKTVFSQDLMQGE |

  

|                                    |       |        |        |          |        |         |         |       |
|------------------------------------|-------|--------|--------|----------|--------|---------|---------|-------|
|                                    | 150   | 160    | 170    | 180      | 190    | 200     | 210     | 220   |
| MKWV-Japan-Ixodes_persulcatus      | DRKEN | TQNLIF | DDAVCC | KVDPQNAI | FPFPPV | PRDVCAI | CKILYRC | CEVPV |
| MKWV-China-Beaemophysalis_concinna | DRKEN | TQNLIF | DDAVCC | KVDPQNAI | FPFPPV | PRDVCAI | CKILYRC | CEVPV |
| MKWV-China-Ixodes_persulcatus      | DRKEN | TQNLIF | DDAVCC | KVDPQNAI | FPFPPV | PRDVCAI | CKILYRC | CEVPV |
| KURV-Japan-Ixodes_persulcatus      | DRKEN | TQNLIF | DDAVCC | KVDPQNAI | FPFPPV | PRDVCAI | CKILYRC | CEVPV |
| MJPV-China-Ixodes_persulcatus      | DRKEN | TQNLIF | DDAVCC | KVDPQNAI | FPFPPV | PRDVCAI | CKILYRC | CEVPV |
| Our_MJPV-Ixodes_persulcatus        | DRKEN | TQNLIF | DDAVCC | KVDPQNAI | FPFPPV | PRDVCAI | CKILYRC | CEVPV |

  

|                                    |        |        |     |         |         |      |         |
|------------------------------------|--------|--------|-----|---------|---------|------|---------|
|                                    | 230    | 240    | 250 | 260     | 270     | 280  | 290     |
| MKWV-Japan-Ixodes_persulcatus      | NAHVTE | DGDPHE | FTD | AGKSCSI | KCGSSST | ...E | CSGDTTF |
| MKWV-China-Beaemophysalis_concinna | NAHVTE | DGDPHE | FTD | AGKSCSI | KCGSSST | ...E | CSGDTTF |
| MKWV-China-Ixodes_persulcatus      | NAHVTE | DGDPHE | FTD | AGKSCSI | KCGSSST | ...E | CSGDTTF |
| KURV-Japan-Ixodes_persulcatus      | NAHVTE | DGDPHE | FTD | AGKSCSI | KCGSSST | ...E | CSGDTTF |
| MJPV-China-Ixodes_persulcatus      | NAHVTE | DGDPHE | FTD | AGKSCSI | KCGSSST | ...E | CSGDTTF |
| Our_MJPV-Ixodes_persulcatus        | NAHVTE | DGDPHE | FTD | AGKSCSI | KCGSSST | ...E | CSGDTTF |

  

|                                    |        |        |       |      |     |       |     |      |
|------------------------------------|--------|--------|-------|------|-----|-------|-----|------|
|                                    | 300    | 310    | 320   | 330  | 340 | 350   | 360 | 370  |
| MKWV-Japan-Ixodes_persulcatus      | GRWYTF | ICFGSK | RRARV | RNRN | VPD | ESAKK | RCT | CVTE |
| MKWV-China-Beaemophysalis_concinna | GRWYTF | ICFGSK | RRARV | RNRN | VPD | ESAKK | RCT | CVTE |
| MKWV-China-Ixodes_persulcatus      | GRWYTF | ICFGSK | RRARV | RNRN | VPD | ESAKK | RCT | CVTE |
| KURV-Japan-Ixodes_persulcatus      | GRWYTF | ICFGSK | RRARV | RNRN | VPD | ESAKK | RCT | CVTE |
| MJPV-China-Ixodes_persulcatus      | GRWYTF | ICFGSK | RRARV | RNRN | VPD | ESAKK | RCT | CVTE |
| Our_MJPV-Ixodes_persulcatus        | GRWYTF | ICFGSK | RRARV | RNRN | VPD | ESAKK | RCT | CVTE |

  

|                                    |       |        |       |        |     |        |       |
|------------------------------------|-------|--------|-------|--------|-----|--------|-------|
|                                    | 380   | 390    | 400   | 410    | 420 | 430    | 440   |
| MKWV-Japan-Ixodes_persulcatus      | FTRPD | ACKNGG | PPFIV | MDGSKG | SSA | IKVKCT | CEVPK |
| MKWV-China-Beaemophysalis_concinna | FTRPD | ACKNGG | PPFIV | MDGSKG | SSA | IKVKCT | CEVPK |
| MKWV-China-Ixodes_persulcatus      | FTRPD | ACKNGG | PPFIV | MDGSKG | SSA | IKVKCT | CEVPK |
| KURV-Japan-Ixodes_persulcatus      | FTRPD | ACKNGG | PPFIV | MDGSKG | SSA | IKVKCT | CEVPK |
| MJPV-China-Ixodes_persulcatus      | FTRPD | ACKNGG | PPFIV | MDGSKG | SSA | IKVKCT | CEVPK |
| Our_MJPV-Ixodes_persulcatus        | FTRPD | ACKNGG | PPFIV | MDGSKG | SSA | IKVKCT | CEVPK |

  

|                                    |       |        |       |      |      |         |       |
|------------------------------------|-------|--------|-------|------|------|---------|-------|
|                                    | 450   | 460    | 470   | 480  | 490  | 500     | 510   |
| MKWV-Japan-Ixodes_persulcatus      | LAGSI | IGYLRG | TMILK | AAWG | PPRW | TLIKWVA | GLTGR |
| MKWV-China-Beaemophysalis_concinna | LAGSI | IGYLRG | TMILK | AAWG | PPRW | TLIKWVA | GLTGR |
| MKWV-China-Ixodes_persulcatus      | LAGSI | IGYLRG | TMILK | AAWG | PPRW | TLIKWVA | GLTGR |
| KURV-Japan-Ixodes_persulcatus      | LAGSI | IGYLRG | TMILK | AAWG | PPRW | TLIKWVA | GLTGR |
| MJPV-China-Ixodes_persulcatus      | LAGSI | IGYLRG | TMILK | AAWG | PPRW | TLIKWVA | GLTGR |
| Our_MJPV-Ixodes_persulcatus        | LAGSI | IGYLRG | TMILK | AAWG | PPRW | TLIKWVA | GLTGR |

  

|                                    |      |      |      |      |     |      |        |     |
|------------------------------------|------|------|------|------|-----|------|--------|-----|
|                                    | 520  | 530  | 540  | 550  | 560 | 570  | 580    | 590 |
| MKWV-Japan-Ixodes_persulcatus      | YPRK | KGVP | IYMY | VVAG | LVV | GSCT | ACSENH | LLS |
| MKWV-China-Beaemophysalis_concinna | YPRK | KGVP | IYMY | VVAG | LVV | GSCT | ACSENH | LLS |
| MKWV-China-Ixodes_persulcatus      | YPRK | KGVP | IYMY | VVAG | LVV | GSCT | ACSENH | LLS |
| KURV-Japan-Ixodes_persulcatus      | YPRK | KGVP | IYMY | VVAG | LVV | GSCT | ACSENH | LLS |
| MJPV-China-Ixodes_persulcatus      | YPRK | KGVP | IYMY | VVAG | LVV | GSCT | ACSENH | LLS |
| Our_MJPV-Ixodes_persulcatus        | YPRK | KGVP | IYMY | VVAG | LVV | GSCT | ACSENH | LLS |

  

|                                    |      |      |      |     |     |      |     |
|------------------------------------|------|------|------|-----|-----|------|-----|
|                                    | 600  | 610  | 620  | 630 | 640 | 650  | 660 |
| MKWV-Japan-Ixodes_persulcatus      | QRSV | IKTL | GSSL | KCR | RGG | SYWT | AS  |
| MKWV-China-Beaemophysalis_concinna | QRSV | IKTL | GSSL | KCR | RGG | SYWT | AS  |
| MKWV-China-Ixodes_persulcatus      | QRSV | IKTL | GSSL | KCR | RGG | SYWT | AS  |
| KURV-Japan-Ixodes_persulcatus      | QRSV | IKTL | GSSL | KCR | RGG | SYWT | AS  |
| MJPV-China-Ixodes_persulcatus      | QRSV | IKTL | GSSL | KCR | RGG | SYWT | AS  |
| Our_MJPV-Ixodes_persulcatus        | QRSV | IKTL | GSSL | KCR | RGG | SYWT | AS  |



```

670      680      690      700      710      720      730      740
MKWV-Japan-Ixodes_persulcatus EQCGGAGCGCFNIHASCLEFYRNEFHRAAGSYEVVFQCAEWVHEIQSVSGTSHQPVLELTMDDGETKQLDNGTISII
MKWV-China-Baemaphysalis_concinna EQCGGAGCGCFNIHASCLEFYRNEFHRAAGSYEVVFQCAEWVHEIQSVSGTSHQPVLELTMDDGETKQLDNGTISII
KURV-Japan-Ixodes_persulcatus EQCGGAGCGCFNIHASCLEFYRNEFHRAAGSYEVVFQCAEWVHEIQSVSGTSHQPVLELTMDDGETKQLDNGTISII
MJPV-China-Ixodes_persulcatus EQCGGAGCGCFNIHASCLEFYRNEFHRAAGSYEVVFQCAEWVHEIQSVSGTSHQPVLELTMDDGETKQLDNGTISII
Our_MJPV-Ixodes_persulcatus EQCGGAGCGCFNIHASCLEFYRNEFHRAAGSYEVVFQCAEWVHEIQSVSGTSHQPVLELTMDDGETKQLDNGTISII

750      760      770      780      790      800      810
MKWV-Japan-Ixodes_persulcatus AIDGETVTSNAPHFIRKSGSKFAIVDEEFSDFPRKGFGLGEIRCPSSQASAEIVSSACLNAAEGLTRYVGQLDSIRCE
MKWV-China-Baemaphysalis_concinna AIDGETVTSNAPHFIRKSGSKFAIVDEEFSDFPRKGFGLGEIRCPSSQASAEIVSSACLNAAEGLTRYVGQLDSIRCE
KURV-Japan-Ixodes_persulcatus AIDGETVTSNAPHFIRKSGSKFAIVDEEFSDFPRKGFGLGEIRCPSSQASAEIVSSACLNAAEGLTRYVGQLDSIRCE
MJPV-China-Ixodes_persulcatus AIDGETVTSNAPHFIRKSGSKFAIVDEEFSDFPRKGFGLGEIRCPSSQASAEIVSSACLNAAEGLTRYVGQLDSIRCE
Our_MJPV-Ixodes_persulcatus AIDGETVTSNAPHFIRKSGSKFAIVDEEFSDFPRKGFGLGEIRCPSSQASAEIVSSACLNAAEGLTRYVGQLDSIRCE

820      830      840      850      860      870      880      890
MKWV-Japan-Ixodes_persulcatus SRMVDPLIFRRGKLPQSRAGTCFTTKPGSSVVEALTSKPIRVILKASMDGTGTOFDVDFPKCSASKNMTGCYS
MKWV-China-Baemaphysalis_concinna SRMVDPLIFRRGKLPQSRAGTCFTTKPGSSVVEALTSKPIRVILKASMDGTGTOFDVDFPKCSASKNMTGCYS
KURV-Japan-Ixodes_persulcatus SRMVDPLIFRRGKLPQSRAGTCFTTKPGSSVVEALTSKPIRVILKASMDGTGTOFDVDFPKCSASKNMTGCYS
MJPV-China-Ixodes_persulcatus SRMVDPLIFRRGKLPQSRAGTCFTTKPGSSVVEALTSKPIRVILKASMDGTGTOFDVDFPKCSASKNMTGCYS
Our_MJPV-Ixodes_persulcatus SRMVDPLIFRRGKLPQSRAGTCFTTKPGSSVVEALTSKPIRVILKASMDGTGTOFDVDFPKCSASKNMTGCYS

900      910      920      930      940      950      960
MKWV-Japan-Ixodes_persulcatus CNHSGTCLCVKAGMDTGATGTMVLKCPSSGIESAFGVSNVKAHCFVAHTDRVINEDECSYSCGRDEKKLHVYGTLL
MKWV-China-Baemaphysalis_concinna CNHSGTCLCVKAGMDTGATGTMVLKCPSSGIESAFGVSNVKAHCFVAHTDRVINEDECSYSCGRDEKKLHVYGTLL
KURV-Japan-Ixodes_persulcatus CNHSGTCLCVKAGMDTGATGTMVLKCPSSGIESAFGVSNVKAHCFVAHTDRVINEDECSYSCGRDEKKLHVYGTLL
MJPV-China-Ixodes_persulcatus CNHSGTCLCVKAGMDTGATGTMVLKCPSSGIESAFGVSNVKAHCFVAHTDRVINEDECSYSCGRDEKKLHVYGTLL
Our_MJPV-Ixodes_persulcatus CNHSGTCLCVKAGMDTGATGTMVLKCPSSGIESAFGVSNVKAHCFVAHTDRVINEDECSYSCGRDEKKLHVYGTLL

970      980      990      1000      1010      1020      1030      1040
MKWV-Japan-Ixodes_persulcatus QYVEPHDDRANESVAPIINPKSDSFSWGNWFLGLDGLGGGWFKTVIFSLLEASGLIIVVILGLRVTRISLFSILM
MKWV-China-Baemaphysalis_concinna QYVEPHDDRANESVAPIINPKSDSFSWGNWFLGLDGLGGGWFKTVIFSLLEASGLIIVVILGLRVTRISLFSILM
KURV-Japan-Ixodes_persulcatus QYVEPHDDRANESVAPIINPKSDSFSWGNWFLGLDGLGGGWFKTVIFSLLEASGLIIVVILGLRVTRISLFSILM
MJPV-China-Ixodes_persulcatus QYVEPHDDRANESVAPIINPKSDSFSWGNWFLGLDGLGGGWFKTVIFSLLEASGLIIVVILGLRVTRISLFSILM
Our_MJPV-Ixodes_persulcatus QYVEPHDDRANESVAPIINPKSDSFSWGNWFLGLDGLGGGWFKTVIFSLLEASGLIIVVILGLRVTRISLFSILM

1050
MKWV-Japan-Ixodes_persulcatus SARWRKIID
MKWV-China-Baemaphysalis_concinna SARWRKIID
KURV-Japan-Ixodes_persulcatus SARWRKIID
Kuriyama virus STRWRKIID
MJPV-China-Ixodes_persulcatus SARWRKIID
Our_MJPV-Ixodes_persulcatus SARWRKIID

```

Amino acid alignment was performed using ESPrpt 3.0 (<http://esprpt.ibcp.fr/ESPrpt/cgi-bin/ESPrpt.cgi>). MKWV, Mukawa virus; KURV, Kuriyama virus; MJPV, Mudanjiang phlebovirus.

**Figure S3. Amino acid of the nucleocapsid protein between MKWV, KURV and MJPV.**

|                                   |     |               |           |      |               |        |    |       |
|-----------------------------------|-----|---------------|-----------|------|---------------|--------|----|-------|
|                                   | 1   | 10            | 20        | 30   | 40            | 50     | 60 | 70    |
| MEKV-Japan-Ixodes_persulcatus     | MSG | KNYAKIALEFGGE | VIDCDFTIS | IAEE | CAYOGFDPIKIME | ITQTRG | QD | WKEDC |
| MEKV-China-Haemaphysalis_concinna | MSG | KNYAKIALEFGGE | VIDCDFTIS | IAEE | CAYOGFDPIKIME | ITQTRG | QD | WKEDC |
| MEKV-China-Ixodes_persulcatus     | MSG | KNYAKIALEFGGE | VIDCDFTIS | IAEE | CAYOGFDPIKIME | ITQTRG | QD | WKEDC |
| KURV-Japan-Ixodes_persulcatus     | MSG | KNYAKIALEFGGE | VIDCDFTIS | IAEE | CAYOGFDPIKIME | ITQTRG | QD | WKEDC |
| MJPV-China-Ixodes_persulcatus     | MSG | KNYAKIALEFGGE | VIDCDFTIS | IAEE | CAYOGFDPIKIME | ITQTRG | QD | WKEDC |
| Our_MJPV-Ixodes_persulcatus       | MSG | KNYAKIALEFGGE | VIDCDFTIS | IAEE | CAYOGFDPIKIME | ITQTRG | QD | WKEDC |

  

|                                   |     |        |        |               |       |           |           |       |
|-----------------------------------|-----|--------|--------|---------------|-------|-----------|-----------|-------|
|                                   | 80  | 90     | 100    | 110           | 120   | 130       | 140       | 150   |
| MEKV-Japan-Ixodes_persulcatus     | RMA | ESGKAK | LNVLIR | KYKLKSGKPGKDD | LTARV | SAVLAPWTC | KVIAHLENM | LPVVG |
| MEKV-China-Haemaphysalis_concinna | RMA | ESGKAK | LNVLIR | KYKLKSGKPGKDD | LTARV | SAVLAPWTC | KVIAHLENM | LPVVG |
| MEKV-China-Ixodes_persulcatus     | RMA | ESGKAK | LNVLIR | KYKLKSGKPGKDD | LTARV | SAVLAPWTC | KVIAHLENM | LPVVG |
| KURV-Japan-Ixodes_persulcatus     | RMA | ESGKAK | LNVLIR | KYKLKSGKPGKDD | LTARV | SAVLAPWTC | KVIAHLENM | LPVVG |
| MJPV-China-Ixodes_persulcatus     | RMS | ESGKAR | LNVLIR | KYKLKSGKPGKDD | LTARV | SAVLAPWTC | KVIAHLENM | LPVVG |
| Our_MJPV-Ixodes_persulcatus       | RMS | ESGKAR | LNVLIR | KYKLKSGKPGKDD | LTARV | SAVLAPWTC | KVIAHLENM | LPVVG |

  

|                                   |        |         |       |        |           |        |       |
|-----------------------------------|--------|---------|-------|--------|-----------|--------|-------|
|                                   | 160    | 170     | 180   | 190    | 200       | 210    | 220   |
| MEKV-Japan-Ixodes_persulcatus     | FGGLID | ASLSRDD | LTAIV | DAHKLW | LVHFAQVIN | RDLRGK | TKADI |
| MEKV-China-Haemaphysalis_concinna | FGGLID | ASLSRDD | LTAIV | DAHKLW | LVHFAQVIN | RDLRGK | TKADI |
| MEKV-China-Ixodes_persulcatus     | FGGLID | ASLSRDD | LTAIV | DAHKLW | LVHFAQVIN | RDLRGK | TKADI |
| KURV-Japan-Ixodes_persulcatus     | FGGLID | ASLSRDD | LTAIV | DAHKLW | LVHFAQVIN | RDLRGK | TKADI |
| MJPV-China-Ixodes_persulcatus     | FGGLID | ASLSRDD | LTAIV | DAHKLW | LVHFAQVIN | RDLRGK | TKADI |
| Our_MJPV-Ixodes_persulcatus       | FGGLID | ASLSRDD | LTAIV | DAHKLW | LVHFAQVIN | RDLRGK | TKADI |

  

|                                   |     |        |         |        |   |
|-----------------------------------|-----|--------|---------|--------|---|
|                                   | 230 | 240    |         |        |   |
| MEKV-Japan-Ixodes_persulcatus     | VD  | LNGKVN | SEVRRAA | EKYROL | V |
| MEKV-China-Haemaphysalis_concinna | VD  | LNGKVN | SEVRRAA | EKYROL | V |
| MEKV-China-Ixodes_persulcatus     | VD  | LNGKVN | SEVRRAA | EKYROL | V |
| KURV-Japan-Ixodes_persulcatus     | VD  | LNGKVN | SEVRRAA | EKYROL | V |
| MJPV-China-Ixodes_persulcatus     | VD  | LNGKVN | SEVRRAA | EKYROL | V |
| Our_MJPV-Ixodes_persulcatus       | VD  | LNGKVN | SEVRRAA | EKYROL | V |

Amino acid alignment was performed using ESPrnt 3.0 (<http://esprnt.ibcp.fr/ESPrnt/cgi-bin/ESPrnt.cgi>). MKWV, Mukawa virus; KURV, Kuriyama virus; MJPV, Mudanjiang phlebovirus.

**Figure S4. Amino acid of the nonstructural protein between MKWV, KURV and MJPV.**

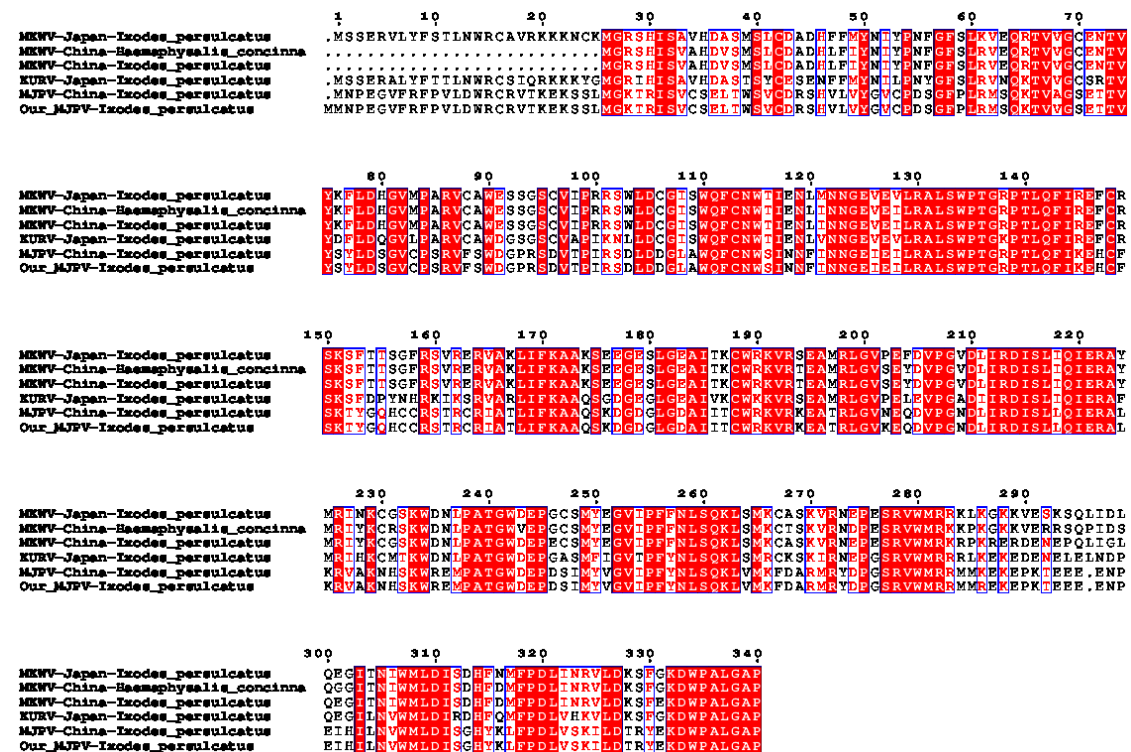

Amino acid alignment was performed using ESPrpt 3.0 (<http://esprpt.ibcp.fr/ESPrpt/cgi-bin/ESPrpt.cgi>). MKWV, Mukawa virus; KURV, Kuriyama virus; MJPV, Mudanjiang phlebovirus.

**Table S1. Nucleotide similarity between MJPV, MKWV and KURV\*.**

| Nucleotide | Virus                                       | MKWV<br>(From <i>H. concinna</i> ) | Japanese<br>MKWV | Japanese<br>KURV | MJPV<br>(From <i>I. persulcatus</i> ) | Our MJPV<br>(From <i>I. persulcatus</i> ) | Our MJPV<br>(From <i>Meriones meridianus</i> ) |
|------------|---------------------------------------------|------------------------------------|------------------|------------------|---------------------------------------|-------------------------------------------|------------------------------------------------|
| L          |                                             |                                    |                  |                  |                                       |                                           |                                                |
|            | Chinese MKWV (From <i>I. persulcatus</i> )  | 92.72                              | 92.89            | 82.55            | 76.23                                 | 76.32                                     | 76.97                                          |
|            | Chinese MKWV (From <i>H. concinna</i> )     | ***                                | 92.75            | 82.65            | 75.93                                 | 75.95                                     | 76.59                                          |
|            | Japanese MKWV (From <i>I. persulcatus</i> ) | ***                                | ***              | 82.85            | 76.39                                 | 76.44                                     | 77.56                                          |
|            | Japanese KURV (From <i>I. persulcatus</i> ) | ***                                | ***              | ***              | 77.60                                 | 77.55                                     | 78.79                                          |
|            | Chinese MJPV (From <i>I. persulcatus</i> )  | ***                                | ***              | ***              | ***                                   | 99.11                                     | 99.29                                          |
|            | Our MJPV (From <i>I. persulcatus</i> )      | ***                                | ***              | ***              | ***                                   | ***                                       | 99.40                                          |
| M          |                                             |                                    |                  |                  |                                       |                                           |                                                |
|            | Chinese MKWV (From <i>I. persulcatus</i> )  | 92.28                              | 92.22            | 83.98            | 69.98                                 | 70.36                                     | ***                                            |
|            | Chinese MKWV (From <i>H. concinna</i> )     | ***                                | 99.94            | 83.38            | 69.92                                 | 70.13                                     | ***                                            |
|            | Japanese MKWV (From <i>I. persulcatus</i> ) | ***                                | ***              | 83.44            | 69.89                                 | 70.10                                     | ***                                            |
|            | Japanese KURV (From <i>I. persulcatus</i> ) | ***                                | ***              | ***              | 70.93                                 | 70.66                                     | ***                                            |
|            | Chinese MJPV (From <i>I. persulcatus</i> )  | ***                                | ***              | ***              | ***                                   | 98.23                                     | ***                                            |
| S          |                                             |                                    |                  |                  |                                       |                                           |                                                |
|            | Chinese MKWV (From <i>I. persulcatus</i> )  | 96.28                              | 94.18            | 79.83            | 71.93                                 | 72.05                                     | ***                                            |
|            | Chinese MKWV (From <i>H. concinna</i> )     | ***                                | 93.97            | 79.51            | 71.74                                 | 72.22                                     | ***                                            |
|            | Japanese MKWV (From <i>I. persulcatus</i> ) | ***                                | ***              | 80.50            | 72.46                                 | 72.81                                     | ***                                            |
|            | Japanese KURV (From <i>I. persulcatus</i> ) | ***                                | ***              | ***              | 72.48                                 | 72.45                                     | ***                                            |
|            | Chinese MJPV (From <i>I. persulcatus</i> )  | ***                                | ***              | ***              | ***                                   | 98.73                                     | ***                                            |

\*MKWV, Mukawa virus; KURV, Kuriyama virus; MJPV, Mudanjiang phlebovirus; *I. persulcatus*, *Ixodes persulcatus*; *H. concinna*, *Haemaphysalis concinna*.

&Partial length of the L segment (2844 bp; strain IM-54).



**Table S2. Amino acid similarity between MJPV, MKWV and KURV\*.**

| Protein      | Virus                                       | MKWV<br>(From <i>H. concinna</i> ) | Japanese<br>MKWV | Japanese<br>KURV | MJPV<br>(From <i>I. persulcatus</i> ) | Our MJPV<br>(From <i>I. persulcatus</i> ) | Our MJPV<br>(From <i>Meriones meridianus</i> ) |
|--------------|---------------------------------------------|------------------------------------|------------------|------------------|---------------------------------------|-------------------------------------------|------------------------------------------------|
| RdRp         |                                             |                                    |                  |                  |                                       |                                           |                                                |
|              | Chinese MKWV (From <i>I. persulcatus</i> )  | 98.70                              | 99.24            | 94.91            | 88.09                                 | 88.20                                     | 89.54                                          |
|              | Chinese MKWV (From <i>H. concinna</i> )     | ***                                | 99.15            | 95.17            | 88.59                                 | 88.64                                     | 90.21                                          |
|              | Japanese MKWV (From <i>I. persulcatus</i> ) | ***                                | ***              | 95.33            | 88.70                                 | 88.75                                     | 90.10                                          |
|              | Japanese KURV (From <i>I. persulcatus</i> ) | ***                                | ***              | ***              | 88.18                                 | 88.18                                     | 89.65                                          |
|              | Chinese MJPV (From <i>I. persulcatus</i> )  | ***                                | ***              | ***              | ***                                   | 99.67                                     | 100.00                                         |
|              | Our MJPV (From <i>I. persulcatus</i> )      | ***                                | ***              | ***              | ***                                   | ***                                       | 100.00                                         |
| Glycoprotein |                                             |                                    |                  |                  |                                       |                                           |                                                |
|              | Chinese MKWV (From <i>I. persulcatus</i> )  | 98.19                              | 98.10            | 93.72            | 70.93                                 | 71.02                                     | ***                                            |
|              | Chinese MKWV (From <i>H. concinna</i> )     | ***                                | 99.91            | 93.72            | 70.93                                 | 71.12                                     | ***                                            |
|              | Japanese MKWV (From <i>I. persulcatus</i> ) | ***                                | ***              | 93.82            | 70.83                                 | 71.02                                     | ***                                            |
|              | Japanese KURV (From <i>I. persulcatus</i> ) | ***                                | ***              | ***              | 70.55                                 | 70.46                                     | ***                                            |
|              | Chinese MJPV (From <i>I. persulcatus</i> )  | ***                                | ***              | ***              | ***                                   | 99.43                                     | ***                                            |
| N            |                                             |                                    |                  |                  |                                       |                                           |                                                |
|              | Chinese MKWV (From <i>I. persulcatus</i> )  | 100.00                             | 99.60            | 93.12            | 84.96                                 | 84.96                                     | ***                                            |
|              | Chinese MKWV (From <i>H. concinna</i> )     | ***                                | 99.60            | 93.12            | 84.96                                 | 84.96                                     | ***                                            |
|              | Japanese MKWV (From <i>I. persulcatus</i> ) | ***                                | ***              | 92.71            | 84.55                                 | 84.55                                     | ***                                            |
|              | Japanese KURV (From <i>I. persulcatus</i> ) | ***                                | ***              | ***              | 81.38                                 | 81.38                                     | ***                                            |
|              | Chinese MJPV (From <i>I. persulcatus</i> )  | ***                                | ***              | ***              | ***                                   | 100.00                                    | ***                                            |
| NSs          |                                             |                                    |                  |                  |                                       |                                           |                                                |
|              | Chinese MKWV (From <i>I. persulcatus</i> )  | 94.29                              | 91.75            | 73.02            | 58.41                                 | 59.05                                     | ***                                            |

|                                             |     |       |       |       |       |     |
|---------------------------------------------|-----|-------|-------|-------|-------|-----|
| Chinese MKWV (From <i>H. concinna</i> )     | *** | 92.38 | 71.75 | 57.78 | 58.10 | *** |
| Japanese MKWV (From <i>I. persulcatus</i> ) | *** | ***   | 75.00 | 56.18 | 56.18 | *** |
| Japanese KURV (From <i>I. persulcatus</i> ) | *** | ***   | ***   | 56.18 | 56.18 | *** |
| Chinese MJPV (From <i>I. persulcatus</i> )  | *** | ***   | ***   | ***   | 99.12 | *** |

---

\* RdRp, RNA-dependent RNA polymerase; N, nucleocapsid protein; NSs, nonstructural protein; MKWV, Mukawa virus; KURV, Kuriyama virus; MJPV, Mudanjiang phlebovirus; *I. persulcatus*, *Ixodes persulcatus*; *H. concinna*, *Haemaphysalis concinna*.

&Partial RdRp of strain IM-54.
